# Supplementary figures and images for: Study on the dynamic characteristics of soft soil
Source: Royal Society of Chemistry journal article supplement (doi:10.1039/c9ra05700e), 2020-01-01

Appendix 1 silt

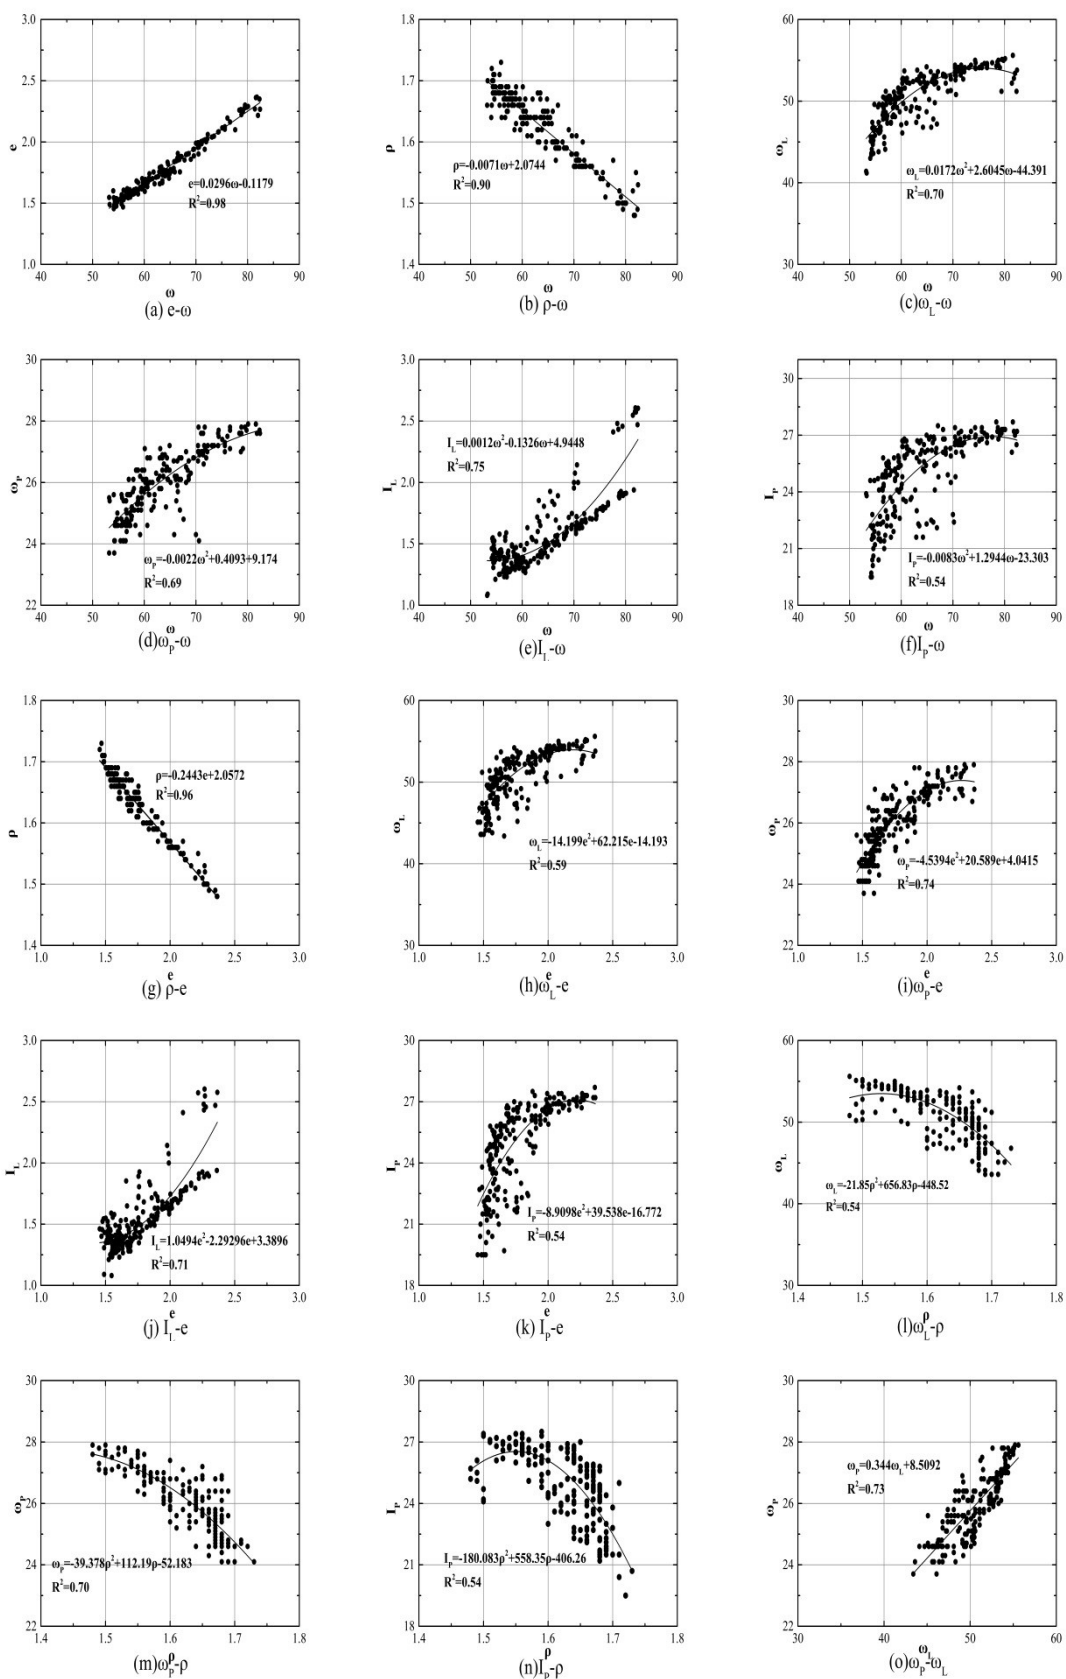

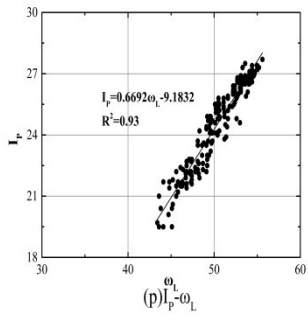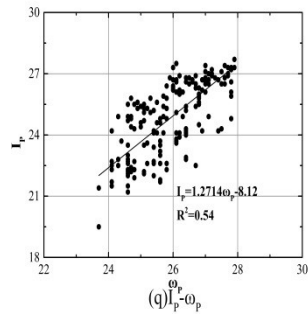

### Appendix 2 clay

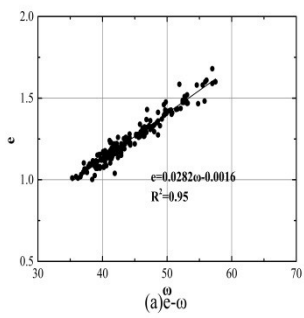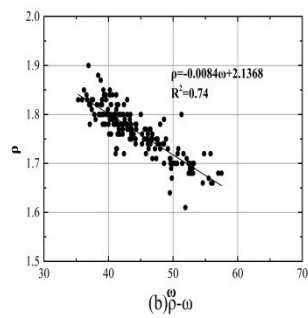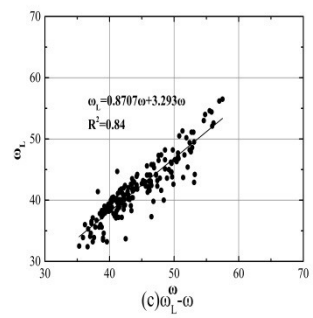

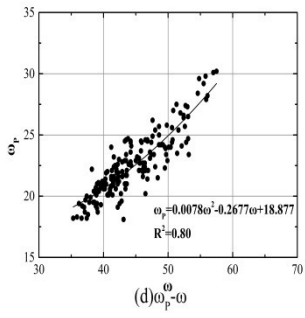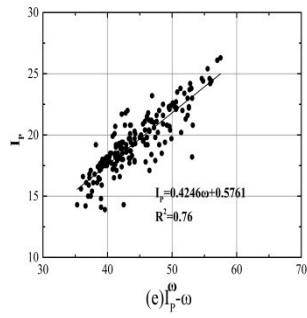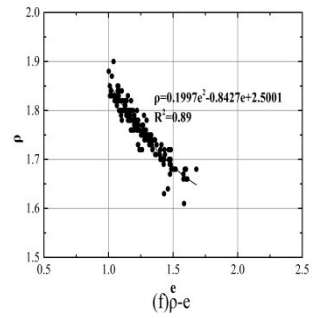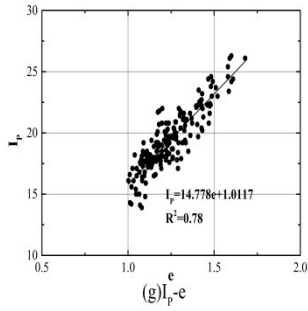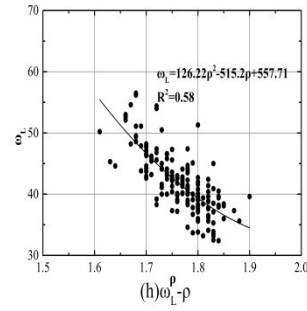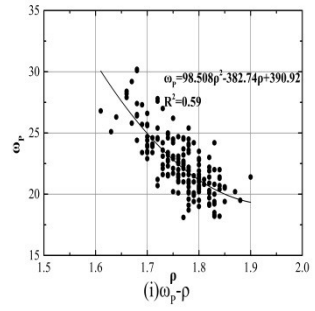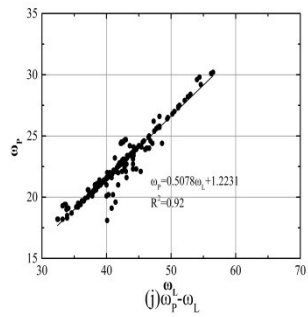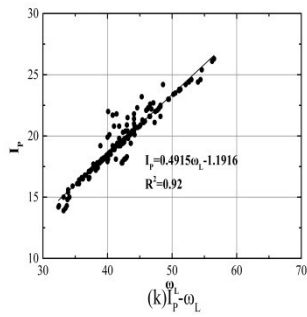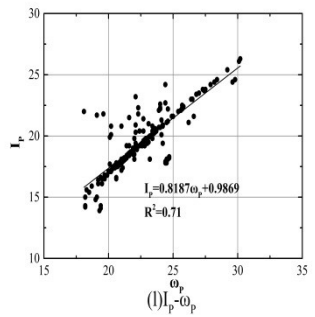

### Appendix 3 Silty clay

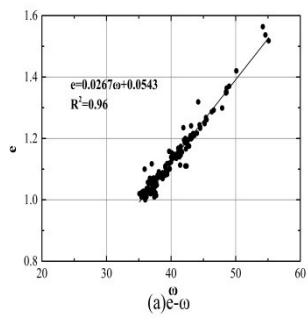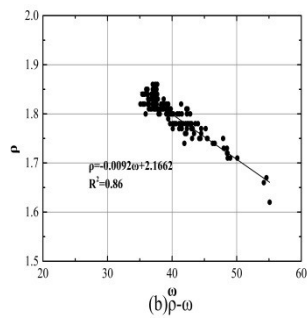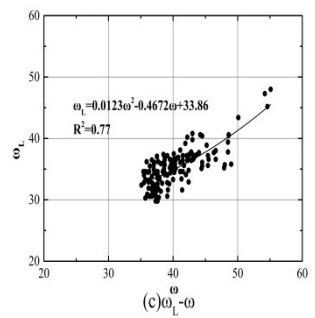

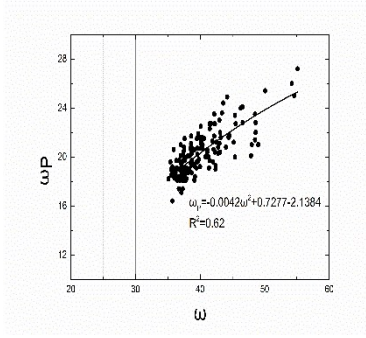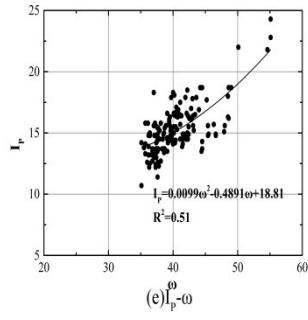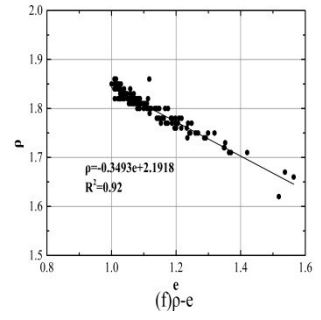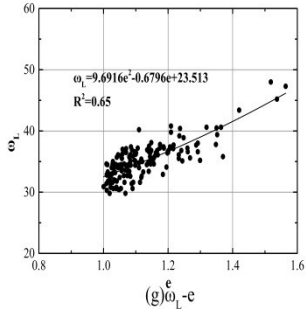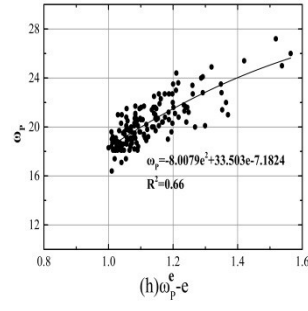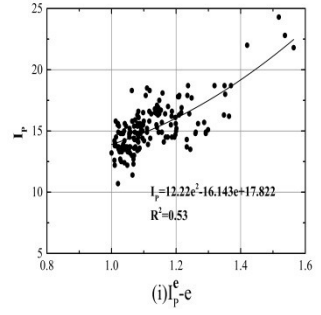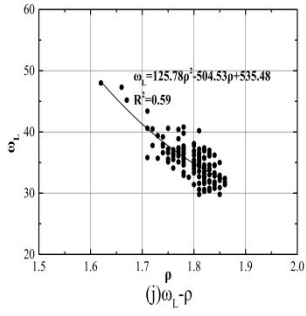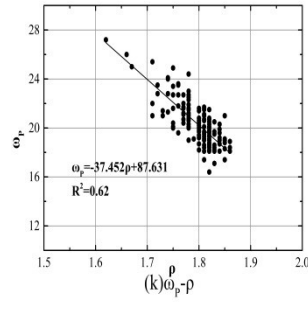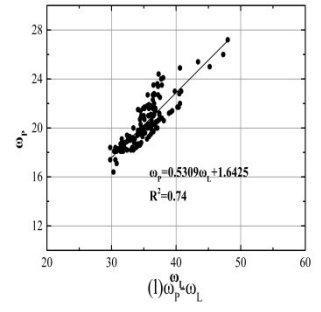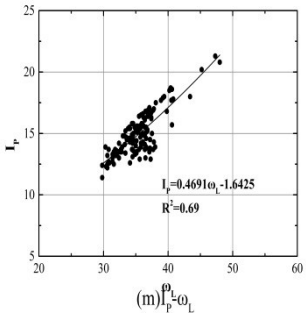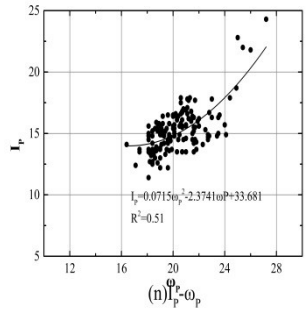

Supplement: c9ra05700e1.pdf [file c9ra05700e1.pdf]
